# Supplementary material
Source: PubMed Central journal article supplement (PMC7453917)
Supplement: NIHMS1039604-supplement-Supplementary_information.pdf [file NIHMS1039604-supplement-Supplementary_information.pdf]

# Supporting Information

## Free-Floating 2D Nanosheets with Superlattice Assembled from Fe<sub>3</sub>O<sub>4</sub> Nanoparticles for Peroxidase-Mimicking Activity

Ren Cai,<sup>†,‡</sup> Dan Yang,<sup>#</sup> Liang Yan,<sup>◇</sup> Feng Tian,<sup>||</sup> Jichao Zhang,<sup>||</sup> Yifan Lyu,<sup>†,‡</sup> Kangfu Chen,<sup>△</sup>  
Chengyi Hong,<sup>†</sup> Xigao Chen,<sup>†</sup> Yuliang Zhao,<sup>◇</sup> Zhuo Chen,<sup>‡</sup> and Weihong Tan<sup>†,‡,\*</sup>

<sup>†</sup>Center for Research at Bio/Nano Interface, Department of Chemistry and Department of Physiology and Functional Genomics, Shands Cancer Center, UF Genetics Institute and McKnight Brain Institute, University of Florida, Gainesville, Florida 32611-7200, United States

<sup>‡</sup>Molecular Science and Biomedicine Laboratory, State Key Laboratory for Chemo/Bio-Sensing and Chemometrics, College of Chemistry and Chemical Engineering, College of Biology, and Collaborative Research Center of Molecular Engineering for Theranostics, Hunan University, Changsha 410082, China

<sup>◇</sup> Chinese Academy of Sciences (CAS), National Center for Nanoscience and Technology, Beijing 100190, China

<sup>||</sup>Shanghai Synchrotron Radiation Facility, Shanghai Institute of Applied Physics, Chinese Academy of Sciences, Shanghai 201204, China

<sup>#</sup>School of Materials Science and Engineering, Nanyang Technological University, 50 Nanyang Avenue, Singapore 639798, Singapore

<sup>△</sup>Department of Mechanical and Aerospace Engineering, University of Florida, Gainesville, Florida 32611-6250, United States

\* To whom correspondence should be addressed.

Email: [tan@chem.ufl.edu](mailto:tan@chem.ufl.edu)

## Chemicals

The following chemicals were used as obtained: iron (III) chloride ( $\text{FeCl}_3 \cdot 6\text{H}_2\text{O}$ , 98%, Sigma-Aldrich), oleic acid (OA, 90%, Sigma-Aldrich), 1-octadecene (ODE, 90%, Sigma-Aldrich), diethylene glycol (99%, DEG, Sigma-Aldrich), octyl ether (99%, TCI), cetyltrimethylammonium bromide (CTAB, 99%, Sigma-Aldrich), sodium oleate (97%, Sigma-Aldrich), hydroxylammonium chloride (99%, Sigma-Aldrich), sodium borohydride ( $\text{NaBH}_4$ , 98%, Sigma-Aldrich), cetyltrimethylammonium bromide (95%, Sigma-Aldrich), cetyltrimethylammonium bromide (99%, Sigma-Aldrich), cetyltrimethylammonium bromide (100.4 %, molecular biology grade, CalBioChem), horseradish peroxidase (HRP, 99%, Sigma-Aldrich, molecular weight ( $\sim 44$  kDa) includes the polypeptide chain (33,890 Da)), hydrogen peroxide ( $\text{H}_2\text{O}_2$ , 30%, Sigma-Aldrich), 3,3',5,5'-tetramethylbenzidine (TMB, 240.35 g/mol, Sigma-Aldrich), polyvinylpyrrolidone (PVP, MW = 55,000, 99.9%, Sigma-Aldrich), hexane (99.9%, Sigma-Aldrich), dimethyl sulfoxide (DMSO, 99.9%, Sigma-Aldrich), N,N-dimethylformamide (DMF, 99.9%, Sigma-Aldrich), toluene (99.9%, Sigma-Aldrich), chloroform (99.9%, Sigma-Aldrich), methanol (absolute for analysis, 99%, Sigma-Aldrich), acetone and ethanol (absolute for analysis, ACS, 99.9%, Merck). All materials were used without further purification.

**Synthesis of iron-oleate complex:** In a typical synthesis of the iron-oleate complex, 10.8 g of iron chloride ( $\text{FeCl}_3 \cdot 6\text{H}_2\text{O}$ , 98%, Sigma-Aldrich) and 36.5 g of sodium oleate were dissolved in a mixed solvent composed of 40 mL ethanol, 40 mL deionized water and 80 mL hexane. The resulting solution was heated to 60 °C and kept at that temperature for four hours. The dark red-black iron oleate precursors were dissolved in 100 mL hexane, washed 3 times with warm DI water ( $\sim 50$  °C) and then separated in a separatory funnel. After washing, hexane was removed by evaporation, resulting in an iron-oleate complex in a waxy solid form.

**Synthesis of iron oxide nanoparticles (NP):**<sup>1</sup> The following is a typical synthetic procedure for monodisperse 7 nm iron oxide nanoparticles. Iron-oleate complex (4.8 g), synthesized as described above, and 0.76 g of oleic acid (90%, Sigma-Aldrich) were dissolved in 6 g octyl ether at room temperature. The mixture was heated to 110 °C and maintained for 60 min under Ar protection. The reaction mixture was then heated to 295 °C with a constant heating rate of 3 °C  $\text{min}^{-1}$  and then held 30 min. When the reaction temperature reached 295 °C, an obvious reaction occurred, and the initial

transparent solution became turbid and brownish black. The colloidal solution was washed 5 times using isopropyl alcohol/hexane (1:1 v/v) by sedimentation and redispersal using centrifugation (5000 rpm for 10 min). Finally, the Fe<sub>3</sub>O<sub>4</sub> NPs were weighed and redispersed in chloroform at the desired NP concentration.

**Synthesis of free-floating 2D nanosheets.** In a typical synthesis of a clear NP-micelle solution (**Figure S1**), 60  $\mu$ L OA were dissolved in a chloroform solution of 7-nm Fe<sub>3</sub>O<sub>4</sub> NPs (4 mg) for 15 min using a vortex mixer. Then, an aqueous solution containing Cetyl-trimethylammonium bromide (CTAB) (100  $\mu$ L, 20 mg/mL) was added to the mixture. Afterwards, the mixture was heated for 15 min. A clear, yellow NP-micelle solution was obtained.

Under vigorous stirring, a DEG solution (1 mL) containing 100 mg polyvinylpyrrolidone (PVP) was quickly injected into above Fe<sub>3</sub>O<sub>4</sub> NP-micelle solution. The mixture was stirred at room temperature for 15 min and then heated to 83 °C and held for another 2 h. Finally, the resulting products were isolated by centrifugation and redispersed in ethanol.

**Small-angle X-ray scattering (SAXS) measurements.** SAXS experiments were performed on the BL16B1 beam-line of the Shanghai Synchrotron Radiation Facility (SSRF). The photon source of the bending magnet of SSRF delivered X-rays of 5 keV to 20 keV. The beam-line optics consisted of a Si(111) flat double crystal monochromator (DCM). The detectors were Mar165 CCD for SAXS. For our SAXS measurements, energy of 10 keV (0.124 nm) and a sample-to-detector distance of 5 m were chosen. Scattering from the sample was transmitted in vacuum through a Kapton window to strike the detector. The  $q$  ranges were 0.03~3.6 nm<sup>-1</sup> for SAXS measurement at 10 keV. Three mg of 2D nanosheets were put on a Compton belt for measurement, and the measurements were performed at room temperature using an angle dispersive synchrotron X-ray source. The  $d$  spacing between superlattice planes was calculated as:  $d = \frac{2\pi}{q}$  and  $d = \frac{4\pi \sin \theta}{\lambda}$ .

**Catalyzed oxidation.** Unless otherwise stated, steady-state kinetic assays were carried out at 30 °C in a 2-mL tube with 0.67  $\mu$ g Fe<sub>3</sub>O<sub>4</sub> sheets (**Figure 1**) or Fe<sub>3</sub>O<sub>4</sub> NPs in 500  $\mu$ L reaction buffer (0.2 M NaAc, pH 4.5) in the presence of 530  $\mu$ M H<sub>2</sub>O<sub>2</sub> for Fe<sub>3</sub>O<sub>4</sub> nanosheets and Fe<sub>3</sub>O<sub>4</sub> NPs, using 800  $\mu$ M 3,3',5,5'-tetramethylbenzidine (TMB) as the substrate. In a typical experiment, 30  $\mu$ L H<sub>2</sub>O<sub>2</sub> were added

to 430  $\mu\text{L}$  reaction buffer at different pH values at 30  $^{\circ}\text{C}$  and vortexed for 3 min. Then, 40  $\mu\text{L}$  TMB (10 mM) were added to the mixture and vortexed for another 3 min. Finally, 0.67  $\mu\text{L}$   $\text{Fe}_3\text{O}_4$  nanosheets (1 mg/mL) were quickly added to the mixture. Immediately after the substrates were added, color changes were observed. All reactions were monitored according to the maximum intensity of absorbance in time-scan mode at 652 nm using a Cary Bio-100 UV/Vis spectrometer (Varian).

To test the effect of different temperatures at pH 4.5, 430  $\mu\text{L}$  of reaction buffer were kept at the desired temperature for 3 min. Then, 30  $\mu\text{L}$   $\text{H}_2\text{O}_2$  were added to the reaction buffer, vortexed for 1 min, and held at that temperature for 3 min. Then, 40  $\mu\text{L}$  TMB (10 mM) were added to the mixture and vortexed 1 min. The mixture was maintained at the desired temperature for another 3 min. Finally, 0.67  $\mu\text{L}$   $\text{Fe}_3\text{O}_4$  nanosheets, or  $\text{Fe}_3\text{O}_4$  NPs (1 mg/mL), was quickly added to the mixture, and the absorbance was monitored at 652 nm.

### **Materials Characterization**

Morphology of the samples was characterized with a transmission electron microscope (TEM) system (JEOL Model JEM-2010F) operating at 200 kV. FTIR measurements were conducted on a Perkin Elmer Instruments Spectrum GX FTIR spectrometer at room temperature from 600 to 4000  $\text{cm}^{-1}$ . A total of 32 scans were recorded at a resolution of 2  $\text{cm}^{-1}$  for averaging each spectrum. UV-Vis measurements were performed with a Cary Bio-100 UV/Vis spectrometer (Varian). Atomic force microscopy (AFM) (Digital Instruments) was used to determine the thickness of the 2D nanosheets. NMR spectra were recorded on a Varian Unity spectrometer (400 MHz for  $^1\text{H}$  NMR). All spectra were examined using MestReNova 8.1 (Mnova) software and displayed without the use of the signal suppression function.



### Calculation of the number of Fe<sub>3</sub>O<sub>4</sub> nanoparticles (NPs) ( $N_{particles}$ )

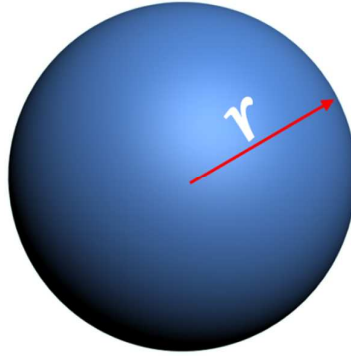

Scheme of one Fe<sub>3</sub>O<sub>4</sub> NP

For one Fe<sub>3</sub>O<sub>4</sub> NP, the radius is  $r$ . The density, mass and volume are  $\rho$ ,  $m_1$  and  $V_1$ . The mass of one Fe<sub>3</sub>O<sub>4</sub> NP ( $m_1$ ) was calculated as

$$m_1 = \rho \cdot V_1 \quad (1)$$

$$V_1 = \frac{4}{3} \pi r^3 \quad (2)$$

$$m_1 = \rho \cdot V_1 = \rho \cdot \frac{4}{3} \pi r^3 \quad (3)$$

The number of Fe<sub>3</sub>O<sub>4</sub> NPs ( $N_{particles}$ ) was calculated as

$$N_{particles} = \frac{m_{Total}}{m_1} = \frac{m_{Total}}{\rho \cdot V_1} = \frac{m_{Total}}{\rho \cdot \frac{4}{3} \pi r^3} \quad (4)$$

where  $\rho=5.17 \text{ g/cm}^3$ ,  $d=2r=7\pm0.5 \text{ nm}$ , and  $m_{Total}$  is the total mass that was weighed in the experiment for  $m_{Total}=4 \text{ mg}$  and  $N_{particles}=4.310 \times 10^{15}$  in 4 mg total mass.

### Calculation of the number of OA molecules ( $N_{OA}$ )

For OA molecules,  $N_A$  is Avogadro constant ( $N_A = 6.022 \times 10^{23} \text{ mol}^{-1}$ ),  $n$  is the number of mole,  $M_{OA}$  is the molecular weight, and  $m$  is total mass. The number of OA molecules ( $N_{OA}$ ) was calculated as

$$N_{OA} = n \cdot N_A \quad (5)$$

$$n = \frac{m}{M_{OA}} \quad (6)$$

$$m = \rho \bullet V \quad (7)$$

The number of OA molecules ( $N_{OA}$ ) was calculated as

$$N_{OA} = n \bullet N_A = \frac{m}{M_{OA}} \bullet N_A = \frac{\rho \bullet V}{M_{OA}} \bullet N_A \quad (8)$$

where  $\rho=0.887 \text{ g/cm}^3$ ,  $M_{OA}= 282.46 \text{ g/mol}$ , and the oleic acid content of the purchased material was 90% (OA, 90%, Sigma-Aldrich).

#### Calculation of the number of OA molecules stabilized on the surface of one $\text{Fe}_3\text{O}_4$ NP ( $N_0$ )

$$N_0 = \frac{N_{OA}}{N_{particles}} \quad (9)$$

The  $N_{OA}$  and  $N_0$  were calculated as follows:

| $V_{OA}$         | $N_{OA}$               | $N_0$               |
|------------------|------------------------|---------------------|
| 0 $\mu\text{L}$  | 0                      | 0                   |
| 10 $\mu\text{L}$ | $1.702 \times 10^{19}$ | $3.949 \times 10^3$ |
| 30 $\mu\text{L}$ | $5.106 \times 10^{19}$ | $1.185 \times 10^4$ |
| 35 $\mu\text{L}$ | $5.957 \times 10^{19}$ | $1.382 \times 10^4$ |
| 40 $\mu\text{L}$ | $6.808 \times 10^{19}$ | $1.580 \times 10^4$ |
| 50 $\mu\text{L}$ | $8.510 \times 10^{19}$ | $1.974 \times 10^4$ |
| 60 $\mu\text{L}$ | $1.021 \times 10^{20}$ | $2.369 \times 10^4$ |

The table of calculation of  $N_{OA}$  and  $N_0$

These data were used to prepare **Figure 2f**.

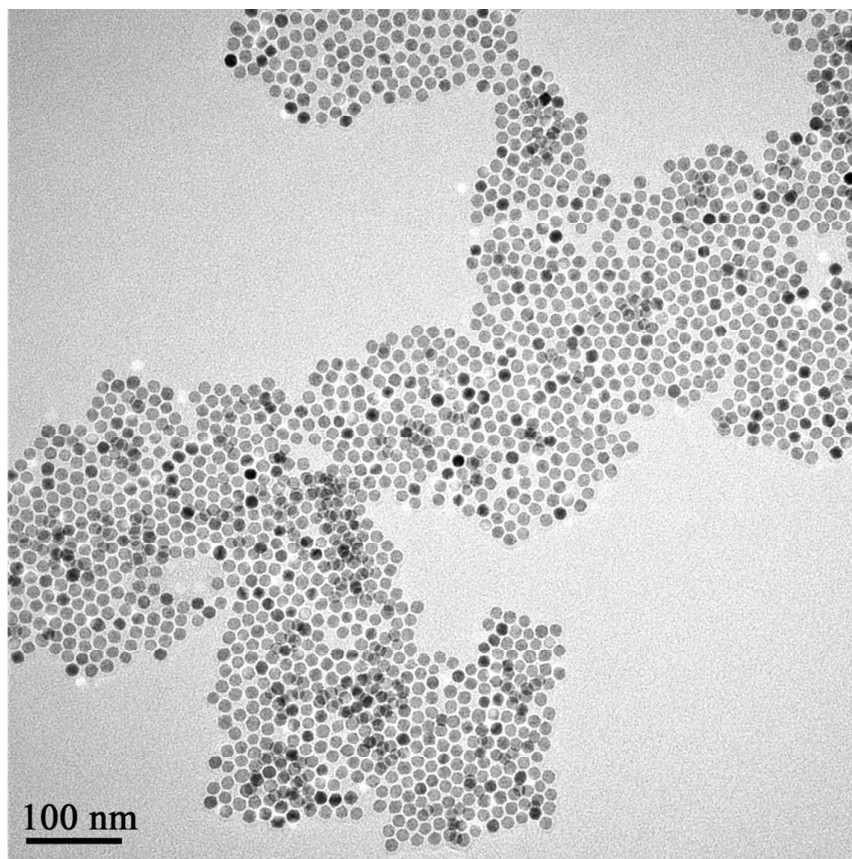

**Figure S1** TEM images of  $\text{Fe}_3\text{O}_4$  NP micelles.

**Note:** The hydrophobic van der Waals interactions between the hydrocarbon chain of the ligands (oleic acid) and the hydrocarbon chain of the surfactant (CTAB) caused these NP micelles to disperse in aqueous solution.<sup>2</sup>

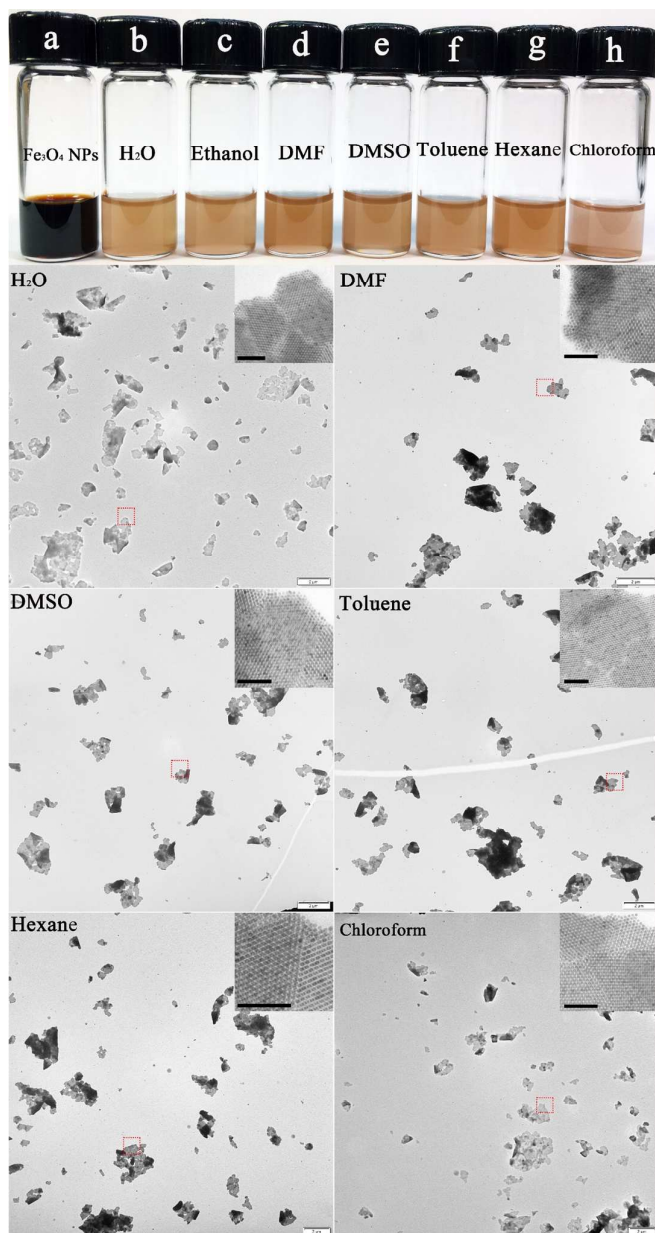

**Figure S2** The stability of 2D nanosheets stored in different solvents for 90 days: a) Fe<sub>3</sub>O<sub>4</sub> NPs building blocks; b) DI-water; c) ethanol; d) DMF; e) DMSO; f) toluene; g) hexane; h) chloroform. The insert scale bars are 100 nm

**Note:** To investigate the stability of 2D nanosheets, we dispersed 2D nanosheets at the same concentration in different solvents and kept them 90 days at room temperature. The usual storage solvent is ethanol, providing a yellow color. In **Figure S2b-h**, the color of all these solutions is yellow, which is totally different from that of their building blocks - Fe<sub>3</sub>O<sub>4</sub> NPs (black, **Figure S2a**). Our TEM results for the samples shown in **Figure S2b-h** confirmed the samples to be nanosheets. From the stability experiments, these 2D nanosheets exhibited excellent stability in different solvents (DI-water, ethanol, DMF, DMSO, toluene, hexane, chloroform) for 90 days without disaggregation into their Fe<sub>3</sub>O<sub>4</sub> NP building blocks (black, **Figure S2a**).

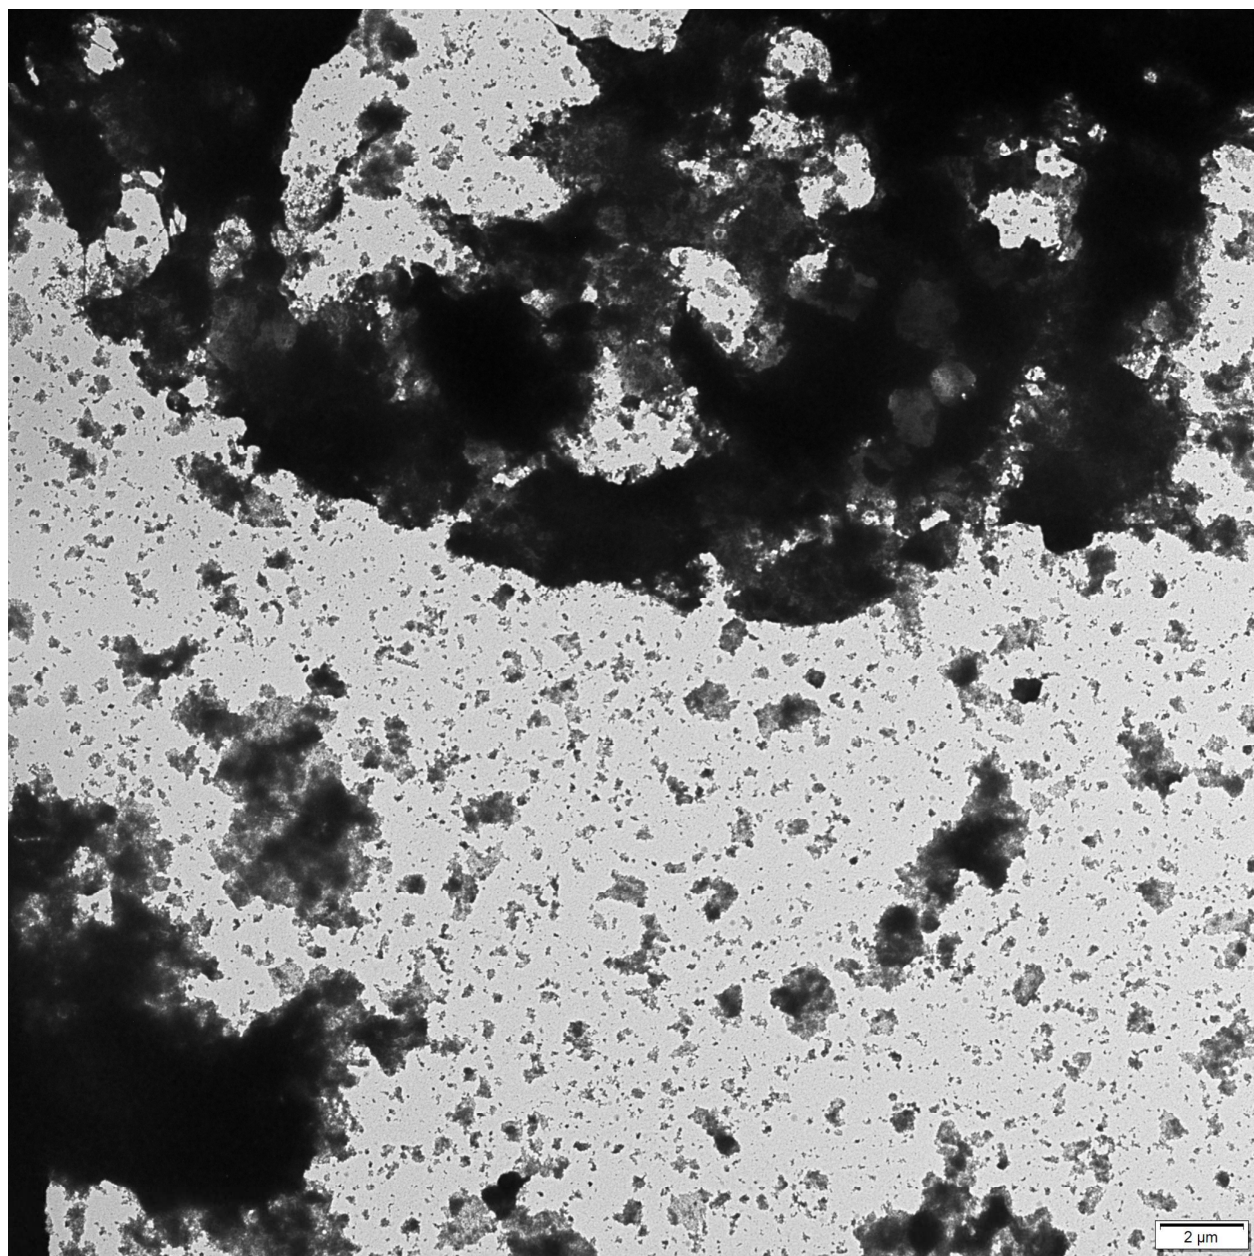

**Figure S3** Samples prepared from Fe<sub>3</sub>O<sub>4</sub> NPs assembled without CTAB, 32 μL OA.



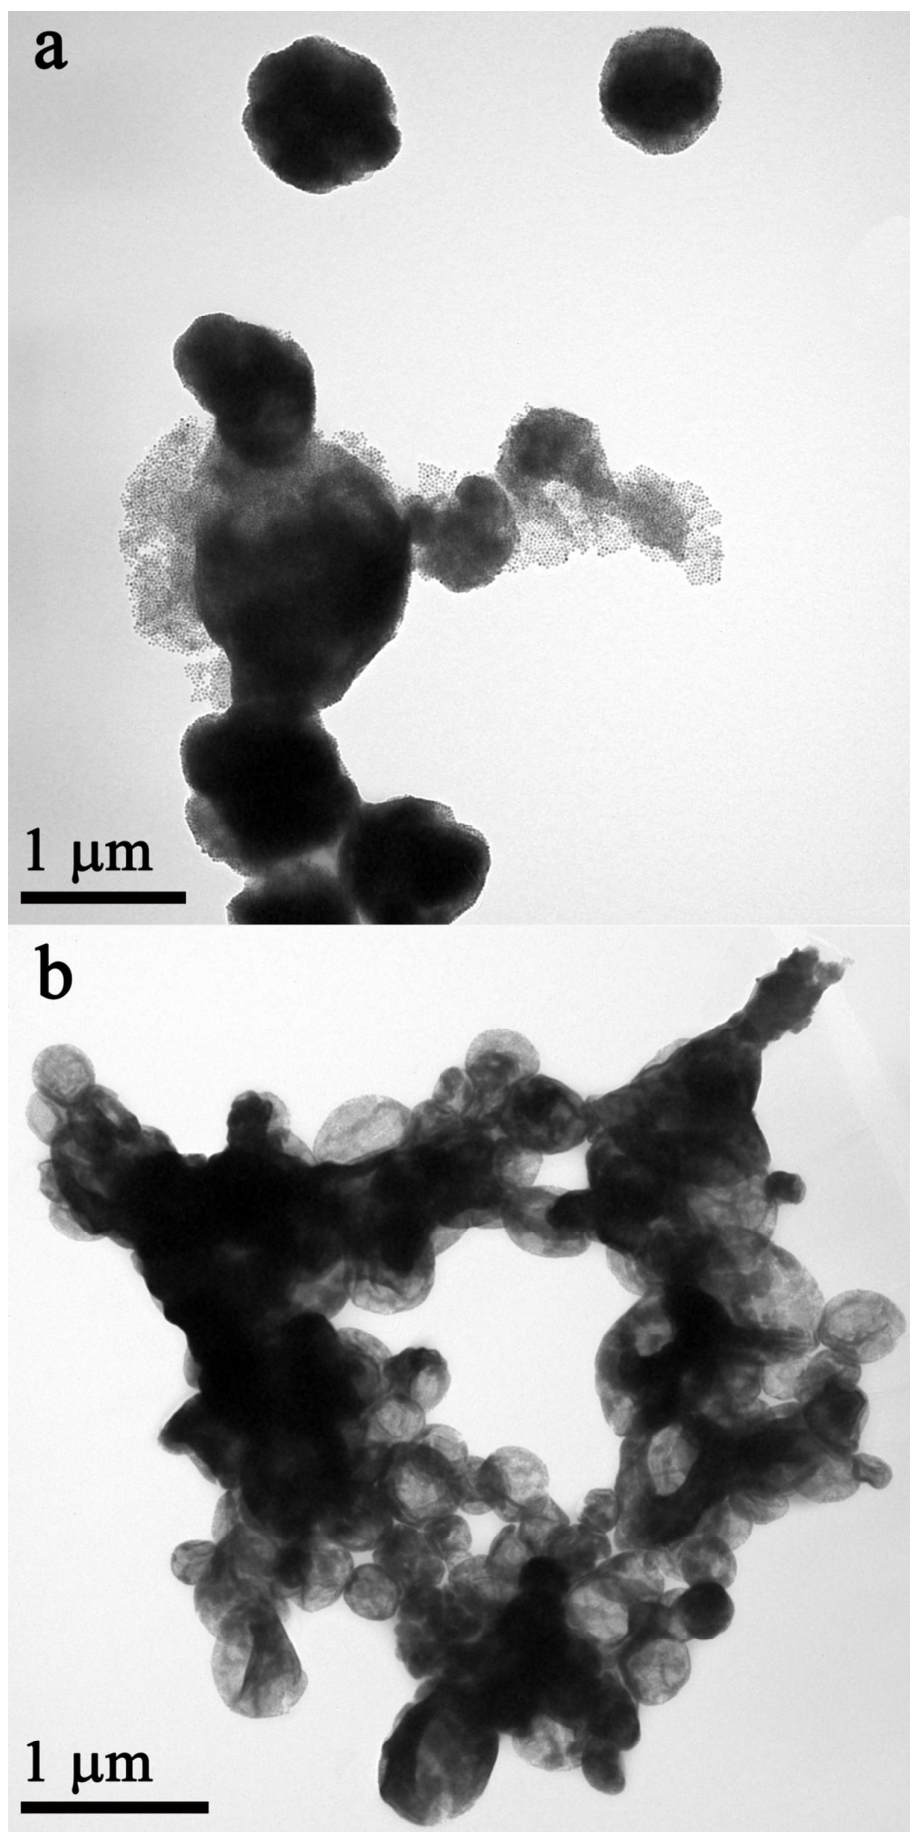

**Figure S4** Samples prepared from  $\text{Fe}_3\text{O}_4$  NPs assembled by adding a) 10  $\mu\text{L}$  and b) 40  $\mu\text{L}$  OA to stabilize  $\text{Fe}_3\text{O}_4$  NPs.

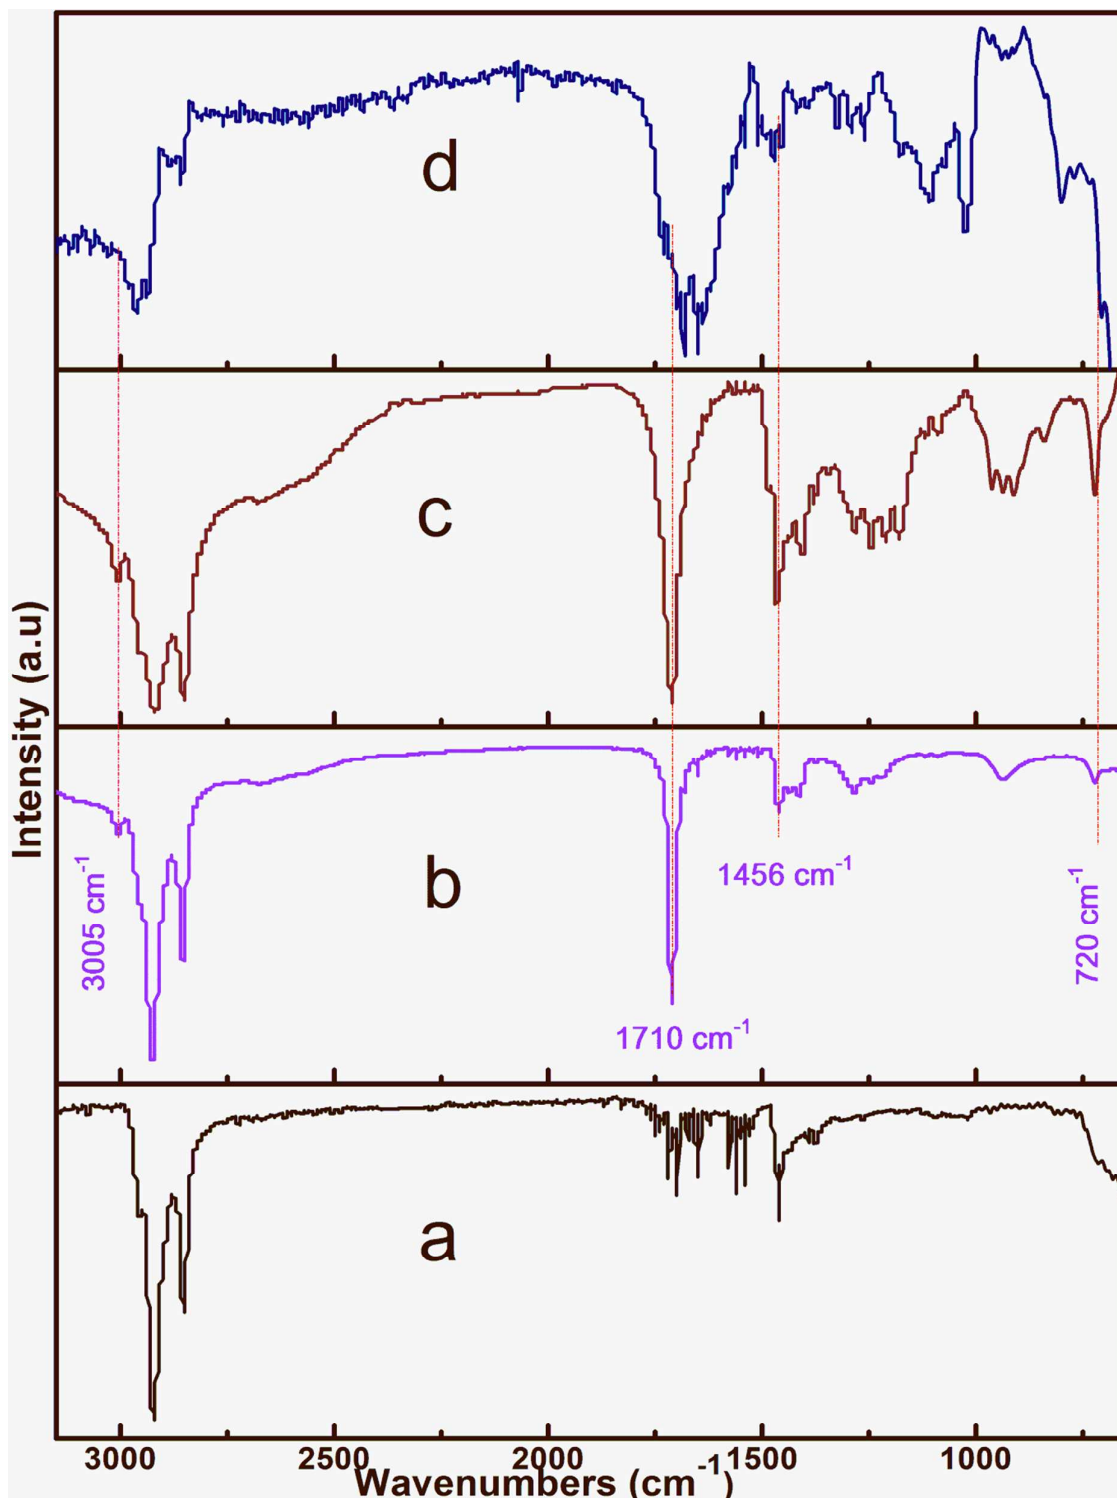

**Figure S5** FTIR spectra of a)  $\text{Fe}_3\text{O}_4$  NPs, b) OA-stabilized  $\text{Fe}_3\text{O}_4$  NPs, c)  $\text{Fe}_3\text{O}_4$  NP micelles and d) organic ligands on the 2D nanosheets (60  $\mu\text{L}$  OA).

**Note:** **Figure S5b-d** shows the band at  $1710\text{ cm}^{-1}$ , resulting from the stretching vibration of C=O in oleic acid, and the band at  $1456\text{ cm}^{-1}$ , corresponding to the asymmetric (-COO-) stretch.<sup>3,4,5</sup> In addition, the  $3005\text{ cm}^{-1}$  and  $720\text{ cm}^{-1}$  peaks originating from the stretching vibration of the -CH=CH- group were observed.<sup>6,7,8</sup> These bands indicate that the oleic acid species are bonded on the surface of  $\text{Fe}_3\text{O}_4$  NPs, as shown in **Figure S5b**.<sup>9</sup> Based on the FTIR spectra, oleic acid is present on the surface of the  $\text{Fe}_3\text{O}_4$  nanosheets, as shown in **Figure S5d**.

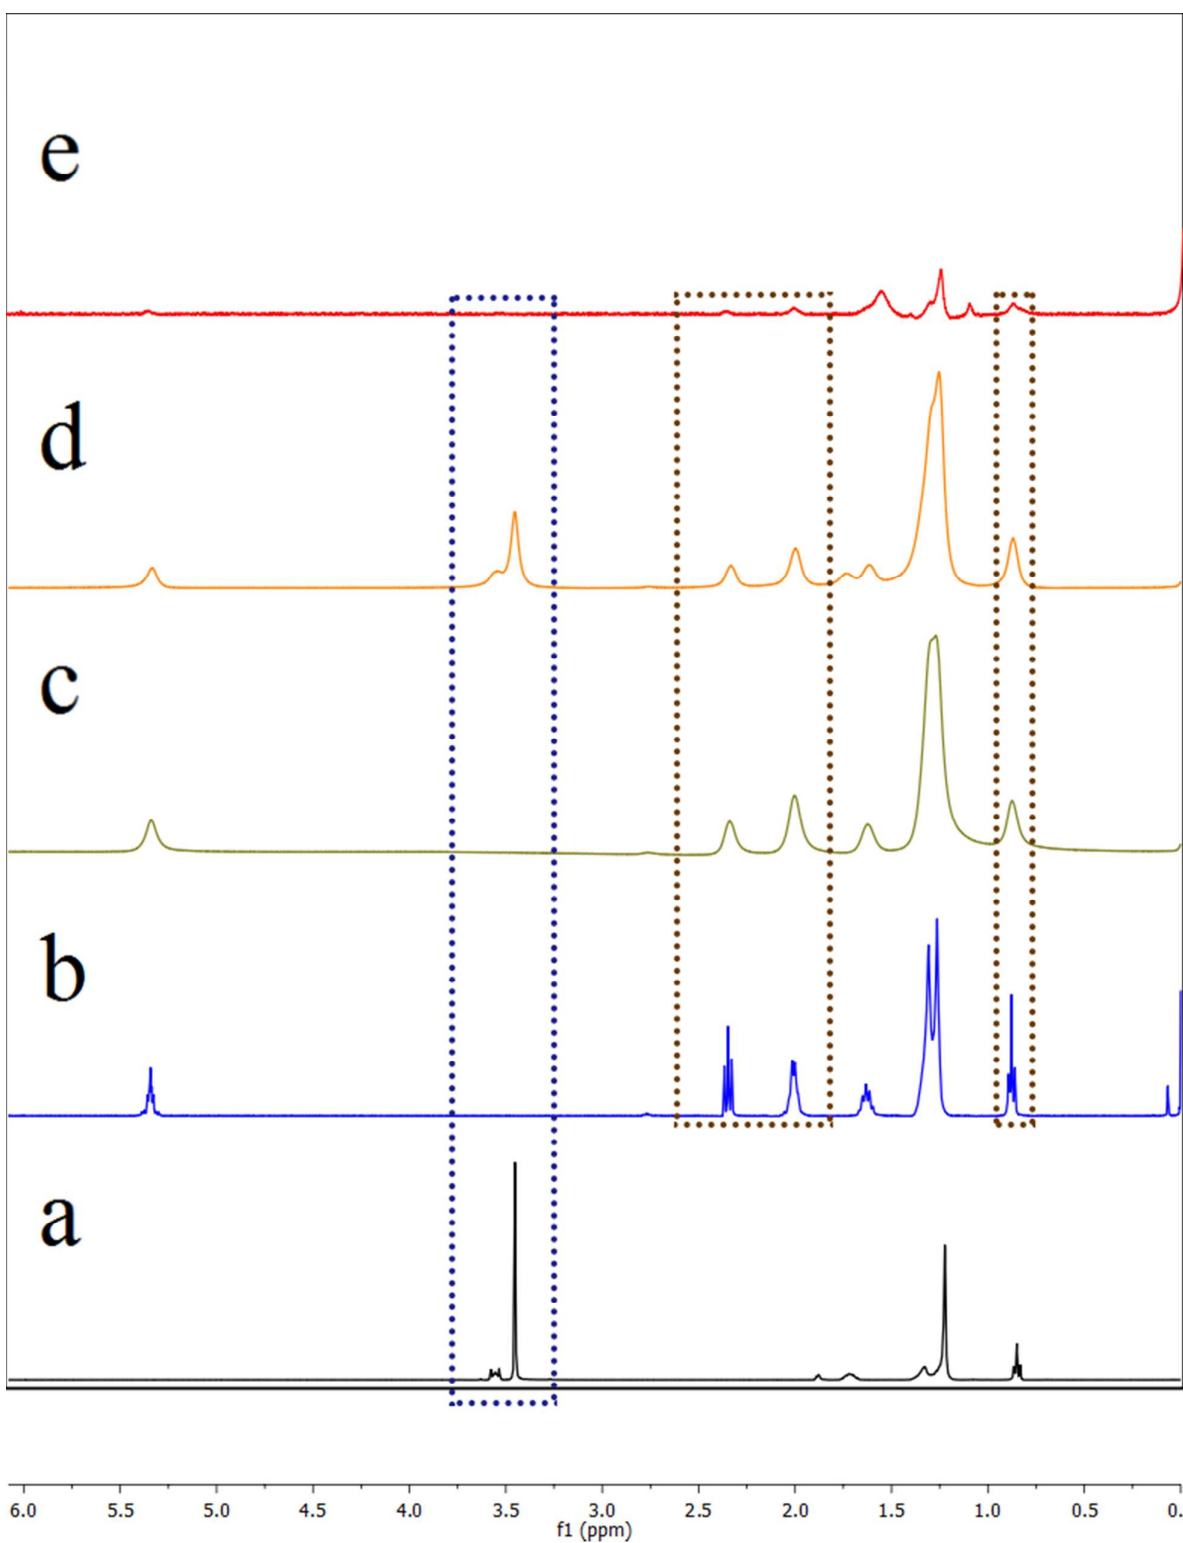

**Figure S6**  $^1\text{H}$  NMR spectra of a) CTAB, b) OA, c) OA on the  $\text{Fe}_3\text{O}_4$  NPs, d) CTAB and OA on the  $\text{Fe}_3\text{O}_4$  NP micelles, and e) the organic ligands (OA) on the 2D nanosheets ( $^1\text{H}$  NMR of  $\text{Fe}_3\text{O}_4$  nanosheets was acquired after dissolving the sample in HCl).

**Note:**  $^1\text{H}$  NMR spectrum in **Figure S6d** shows that the organic ligands on the surface of  $\text{Fe}_3\text{O}_4$  NP micelles were both oleic acid and CTAB molecules. In contrast, the organic ligands on the surface of  $\text{Fe}_3\text{O}_4$  nanosheets were only oleic acid, and CTAB was not measurable in **Figure S6e**. These  $^1\text{H}$  NMR spectra results confirmed the loss of CTAB and presence of OA during the assembly process.



**Table S1** Comparison of the kinetic parameters of Fe<sub>3</sub>O<sub>4</sub> nanosheets and Fe<sub>3</sub>O<sub>4</sub> NPs. [E] is the enzyme (or NP) concentration,  $K_m$  is the Michaelis constant,  $V_{max}$  is the maximal reaction velocity and  $K_{cat}$  is the catalytic constant, where  $K_{cat} = V_{max} / [E]$ .

|                                           | [E] ( $10^{-11}$ M) | Substrate                     | $K_m$ (mM) | $V_{max}$ ( $10^{-8}$ M s <sup>-1</sup> ) | $K_{cat}$ ( $10^2$ s <sup>-1</sup> ) |
|-------------------------------------------|---------------------|-------------------------------|------------|-------------------------------------------|--------------------------------------|
| Fe <sub>3</sub> O <sub>4</sub> nanosheets | 2.40                | TMB                           | 0.201      | 15.02                                     | 62.80                                |
| Fe <sub>3</sub> O <sub>4</sub> nanosheets | 2.40                | H <sub>2</sub> O <sub>2</sub> | 0.186      | 15.80                                     | 65.82                                |
| Fe <sub>3</sub> O <sub>4</sub> NPs        | 2.40                | TMB                           | 0.151      | 11.56                                     | 48.16                                |
| Fe <sub>3</sub> O <sub>4</sub> NPs        | 2.40                | H <sub>2</sub> O <sub>2</sub> | 0.202      | 11.82                                     | 49.25                                |

**Note:**  $K_m$  is an indicator of enzyme affinity to substrate, with a high  $K_m$  value representing a weak affinity and vice versa. **Table S1** shows that the apparent  $K_m$  value of Fe<sub>3</sub>O<sub>4</sub> nanosheets with H<sub>2</sub>O<sub>2</sub> as the substrate was significantly lower than that of Fe<sub>3</sub>O<sub>4</sub> NPs. Thus, Fe<sub>3</sub>O<sub>4</sub> nanosheets showed better affinity to H<sub>2</sub>O<sub>2</sub> compared to Fe<sub>3</sub>O<sub>4</sub> NPs. The maximum initial velocities ( $V_{max}$ ) of Fe<sub>3</sub>O<sub>4</sub> nanosheets are around 50% higher than the  $V_{max}$  values for Fe<sub>3</sub>O<sub>4</sub> NPs.

## References:

1. Park, J.; An, K.; Hwang, Y.; Park, J.-G.; Noh, H.-J.; Kim, J.-Y.; Park, J.-H.; Hwang, N.-M.; Hyeon, T., Ultra-large-scale Syntheses of Monodisperse Nanocrystals. *Nat. Mater.* **2004**, *3*, 891-895.
2. H.J. Butt, K. Graf, M. Kappl, *Physics and Chemistry of Interfaces*, Wiley-VCH, Weinheim, 2006;.
3. Yang, K.; Peng, H.; Wen, Y.; Li, N., Re-examination of Characteristic FTIR Spectrum of Secondary Layer in Bilayer Oleic Acid-coated Fe<sub>3</sub>O<sub>4</sub> Nanoparticles. *Appl. Surf. Sci.* **2010**, *256*, 3093-3097.
4. Wang, C. Y.; Hong, J. M.; Chen, G.; Zhang, Y.; Gu, N., Facile Method to Synthesize Oleic Acid-Capped Magnetite Nanoparticles. *Chinese Chem. Lett.* **2010**, *21*, 179-182.
5. Zhang, L.; He, R.; Gu, H.-C., Oleic Acid Coating on The Monodisperse Magnetite Nanoparticles. *Appl. Surf. Sc.* **2006**, *253*, 2611-2617.
6. Korolev, V. V.; Ramazanova, A. G.; Blinov, A. V., Adsorption of Surfactants on Superfine Magnetite. *Russian Chem. Bull.* **2002**, *51*, 2044-2049.
7. Marinca, T. F.; Chicinaș, H. F.; Neamțu, B. V.; Isnard, O.; Pascuta, P.; Lupu, N.; Stoian, G.; Chicinas, I., Mechano-synthesis, Structural, Thermal and Magnetic Characteristics of Oleic Acid Coated Fe<sub>3</sub>O<sub>4</sub> Nanoparticles. *Mater. Chem. Phys.* **2016**, *171*, 336-345.
8. Wu, N. Q.; Fu, L.; Su, M.; Aslam, M.; Wong, K. C.; Dravid, V. P., Interaction of Fatty Acid Monolayers with Cobalt Nanoparticles. *Nano Lett.* **2004**, *4*, 383-386.
9. Li, Y. Z.; Ma, F. Y.; Su, X. T.; Sun, C.; Liu, J. C.; Sun, Z. Q.; Hou, Y. L., Synthesis and Catalysis of Oleic Acid-coated Fe<sub>3</sub>O<sub>4</sub> Nanocrystals for Direct Coal Liquefaction. *Catal. Commun.* **2012**, *26*, 231-234.
